# Supplementary material for: CRISPR/Cas9 Gene Editing of NtAITRs, a Family of Transcription Repressor Genes, Leads to Enhanced Drought Tolerance in Tobacco
Source: MDPI journal article supplement (doi:10.3390/ijms232315268), 2022-12-03
Supplement: s1 [file s1]

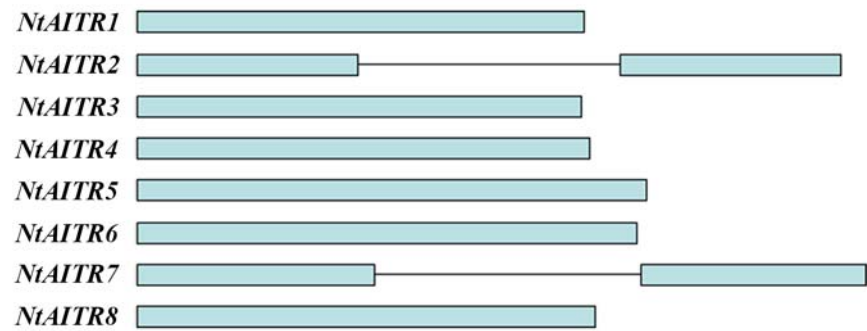

**Figure S1.** Diagram of gene structure of *NtAITRs*.  
Boxes indicate exons, and lines indicate introns.

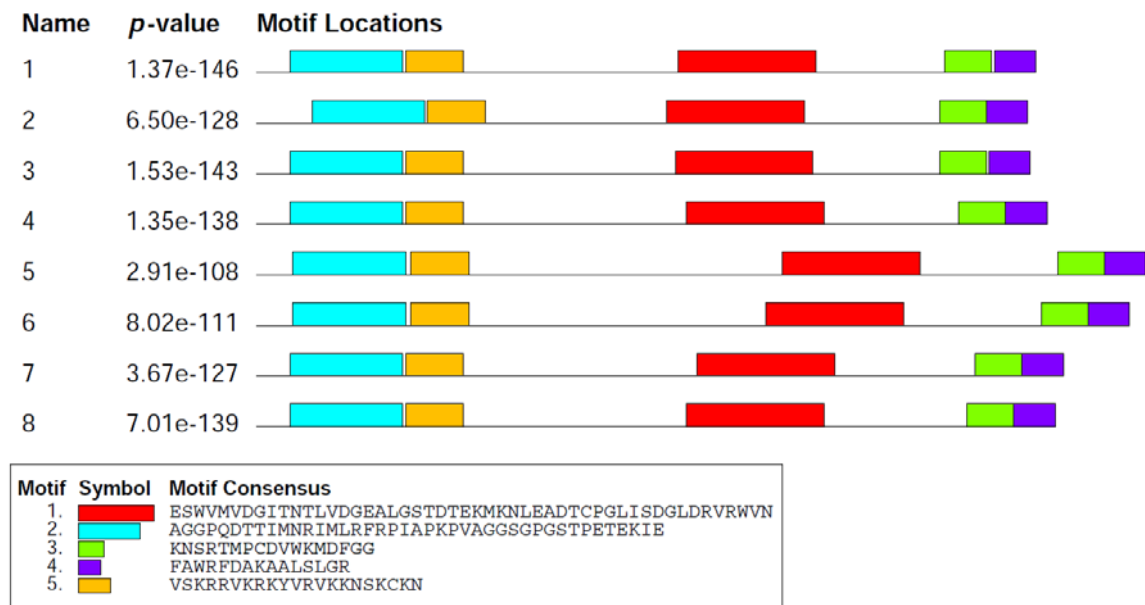

**Figure S2.** Conserved domains in *NtAITRs*.  
Motif analysis was performed using MEME.

|         |                                                      |     |
|---------|------------------------------------------------------|-----|
| NtA1TR1 | -----ATGGACGGTGGAAATGGTTGGCCCGC                      | 26  |
| NtA1TR3 | -----ATGGACGGTGGAAATGGTTGGCCAGC                      | 26  |
| NtA1TR2 | ATGAGACAGAGCTCTTCAACAGGTATGGATGTTGGGATGGTTGGGCCCTC   | 50  |
| NtA1TR7 | -----ATGGATGTTGAGAAATAGTGGGCCCTC                     | 26  |
| NtA1TR4 | -----ATGGACATCGA AAA CAATTGGGCCCG                    | 26  |
| NtA1TR8 | -----ATGGACGTCGGAACAATTGGGCCCG                       | 26  |
| NtA1TR5 | -----ATGGATGGTAGAGGAGGGTGTGTAT                       | 26  |
| NtA1TR6 | -----ATGGATGGTAGAGGAGGGTGTGTAT                       | 26  |
| NtA1TR1 | CGCTAGATACGCCGG--TGGACCGCAGGATACGACGATAAAGAACC       | 73  |
| NtA1TR3 | CGCTAGATACGCCGG--TGGACCGCAGGATACAAAGATAATGAACATA     | 73  |
| NtA1TR2 | CGATGGATGCCACGT--TGGACCTTATGATACGACGATAATGAACC       | 97  |
| NtA1TR7 | CTATGGATGCCACGT--TGGACCAAGATAGGATGATAATGAACC         | 73  |
| NtA1TR4 | CCCAAGAACTCAAG--CGCACAAAGATATGACAATAATCAACA          | 73  |
| NtA1TR8 | GTCCTGGCTACCCCGG--TGCACCTAAAGATATGACGATAATCAACA      | 73  |
| NtA1TR5 | TGCTAGGTACGCAAGGGGGTGGTGGTACGATATGTCAAAAGTGGACC      | 76  |
| NtA1TR6 | TGCTAGGTACGCAAGGGGGTGGTGGTGGTACGATATGTCAAAAGTGGACC   | 76  |
| NtA1TR1 | TAATGCTAAGATTCCGACCGATCGCACTTAAACC                   | 123 |
| NtA1TR3 | TAATGCTAAGATTCCGACCGATCGCACTTAAACC                   | 123 |
| NtA1TR2 | TAATGTTAAGATTCCGGCCGATTGCGCCGAAACCTGTGTGGCCGACGGTTCA | 147 |
| NtA1TR7 | TAATGTTAAGATTCCGGCCGATTGCAACCGAAACCGTCCGCCGACGGTTCA  | 123 |
| NtA1TR4 | TGATGCTAAGATTCCGGCCGATTGCGCCGAAACCGTCCGCTAATCTTTCA   | 123 |
| NtA1TR8 | TGATGCTAAGATTCCGGCCGATTGCGCCGAAACCGTCCGCTAATCTTTCA   | 123 |
| NtA1TR5 | TTATGCTCAGATTCAAGCCATCGCTCTTAAACCAAGCCGCTGGTGGTCT    | 124 |
| NtA1TR6 | TAATGCTCAGATTCAAGCCATCGCTCTTAAACCAAGCCGCTGGTGGTCT    | 124 |
| NtA1TR1 | TCTCCTGGTTCAACACCGGAAGGAACAAGATAGAA--CTTGTTACCAA     | 170 |
| NtA1TR3 | TCTCCTGGTTCAACACCGGAAGGAACAAGATAGAA--CTTGTTACCAA     | 170 |
| NtA1TR2 | GGTCCCTGGTTCTAAACCGAAGAGTGAAGAGGCTGAA--CCGGTCAAGCAA  | 194 |
| NtA1TR7 | GGTCCGGGTTCTAAACCGGAGAAATGAAGAGGCAAGAA--CCGGTTAGCAG  | 170 |
| NtA1TR4 | GGCTCTGGCTCTACGATCGAGACTCAGAGATTGAA--GTGGTTAGCAA     | 170 |
| NtA1TR8 | GGCTCTGGCTCTACGATCGAGACTCATAAGATTGAA--GTGGTTAGCAA    | 170 |
| NtA1TR5 | GTTTCCGGTGGTCTTCTACTCCGCGACAAAAGACTGAGGTTCTGTTCTGTAC | 174 |
| NtA1TR6 | GTTTCCGGCGCTTCTACTCCTCCACAAAAGACTGAGGCTCCTGTTCTGTAC  | 174 |
| NtA1TR1 | ACGAAGAGTCAAAAGAAAGTACGTTAGAGTTAAGAAAAA--TAGCA       | 214 |
| NtA1TR3 | ACGAAGAGTCAAAAGAAAGTACGTTAGAGTTAAGAAAAA--TAGCA       | 214 |
| NtA1TR2 | ACGGAGAGGGGAAGAGAAAGTACGTTAGAGTTAAGAAAAAG--TAGGA     | 238 |
| NtA1TR7 | ACGAAGAGGGGAAGAGAAAGTACGTTAGAGTTAAGAAAAA--TAGGA      | 214 |
| NtA1TR4 | AAAGAAGAACAAAGAGAAAGTACGTTAGAGTTAAGAAAAA--TAGCA      | 214 |
| NtA1TR8 | AAAGAAGAACAAAGAGAAAGTACGTTAGAGTTAAGAAAAA--TAGCA      | 214 |
| NtA1TR5 | GGGTCGGTGGAAACGAAGGTACGTTCAAGATAAATAAAAGTAGTACTAGTA  | 224 |
| NtA1TR6 | GGGCCGTTGGAAACGAAGGTACGTTAAGATAAATAAAACACTAGTAGCA    | 224 |
| NtA1TR1 | AGTT--CAAAAG--TAACAAAGAAG--AAGA                      | 235 |
| NtA1TR3 | AGTG--CAAAAG--TAACAAAGAAG--AAGG                      | 235 |
| NtA1TR2 | AGTGTACTAACAA--TAGTACAGAGA--AAGA                     | 264 |
| NtA1TR7 | AGTG--TAAGAA--TAGTGCAGAGA--AAGA                      | 235 |
| NtA1TR4 | ACTA--CAAGAA--TAAAAAAGAAG--ACAA                      | 235 |
| NtA1TR8 | ATTAA--CAAGAA--TAAAAAAGAAG--ACAG                     | 235 |
| NtA1TR5 | GCTCTAACAAAGAGGTCTAGTAGTGGAAGTCGTAGTCCTGCTGGTCAAAAA  | 274 |
| NtA1TR6 | CTTCTAACAAAGAGATCTAGTAGCGGAAGTCGTAGTCCTAGTGGTAGAAAA  | 274 |
| NtA1TR1 | AGGAGAAAA--GGACGGATCCTTACAG--TTTACTGA                | 272 |
| NtA1TR3 | AGAAAAGGA--CGGATCCTTACAG--TTTACTGA                   | 265 |
| NtA1TR2 | AGAAAGAAAAATTT--AGATGGATCTTTGAAGAAAGTTTATGA          | 305 |
| NtA1TR7 | AGAAAGAAA--AGATGGATCT--GATAA                         | 263 |
| NtA1TR4 | AGAAACAAA--AGATGGATCCTTAGTTT--TTGGATGA               | 272 |
| NtA1TR8 | AGAAA AAAA--AGAAGGATCTTTAGTTT--TTGGATGA              | 272 |
| NtA1TR5 | AGGAAGGCACTTTCCCTGAGGAAATGAGTCCAAACGGTAAGACTGTATC    | 324 |
| NtA1TR6 | AGGAAGGCACTTTCCCTGAGGAAATGAGTCCAAACGGTAAGACTGTATC    | 324 |

NtAIR1 TAGTCAA - - - - - A - - - - CTGTTTAAACCCCTTCAGTTGATGC 304  
 NtAIR3 TAGTAAA - - - - - A - - - - CTGTTTAAACCCCTTCAGTTGATGC 301  
 NtAIR2 TAATGGA - - - - - A - - - - GTGTAGTAACCTTCAGCTACTAC 337  
 NtAIR7 TAATGGA - - - - - T - - - - CTATTGTAACCCCTTCAGTTACTTC 295  
 NtAIR4 TCATGGA - - - - - A - - - - CAGTTGTAACACTACAACCTACTGC 304  
 NtAIR8 TCATGGA - - - - - A - - - - CTATTGTAACACTTCAGCTACTGC 304  
 NtAIR5 TGGTGGTACAGTTTCTGGGGGCCAAGCGGTAGTTACCTTACCCTTATTAT 376  
 NtAIR6 TGGTGGG - - - - - CAAGCTGTAGTTACCTTACCCTTATTAT 361

NtAIR1 CTGAAAGC - - - - AGTAGCAGCGTTA - AGAACTCTTTAGAAAAT - - ATCGG 347  
 NtAIR3 CTGAAAGC - - - - AGCAGCAGCGTTA - AGAACTCTCTAGAAAAT - - ATCGG 344  
 NtAIR2 CGGAAAGT - - - - AGCAGCAGCACTA - CTAACCTTCCAGATAATGATCTT 382  
 NtAIR7 CGGAGAGT - - - - AGCAGCAGTGTTA - CAAACCCGACAGATAACGTTTCTT 346  
 NtAIR4 CAGAAAGT - - - - AGTGGAGGAGTTA - AACGCTCACCAGATAACAGATCTT 345  
 NtAIR8 CAGAAACT - - - - AGTGGAGGAGTTA - AAAACTCACCAGAGAACAGATCTT 345  
 NtAIR5 CCGAGTCTCCTGAAAGGAAGGGTTCCTCTGTCGATCATTCAGTAGGTTTT 426  
 NtAIR6 CAGAGTCTCCTGAAAGGAAGGACTCTCCTCTGGCGATCATTCAGTAGGTTTG 411

NtAIR1 ATCTAGA - - - - - CTTTTT - - - - GGATGAATT - - - - - 376  
 NtAIR3 ATCTAGA - - - - - CTTTTT - - - - GGATGAATT - - - - - 367  
 NtAIR2 TTCAAAAGGAAATCACTTTTCTC - TGAGCTAGATC - - - - - 415  
 NtAIR7 TTCAAAAAGAAATCTCTTTCTC - TGAGCTAGATCAACCCCAATGGATGAG 385  
 NtAIR4 TCCCAAAAACCATCAATTTTT - - - - GGATGAATT - - - - - 375  
 NtAIR8 ACCCAAAAACCATCAATTTTT - - - - GGATGAATT - - - - - 375  
 NtAIR5 GTGATAAAAACCGAATAAATATGCTCCGATATGGTTAACTTTGGTAGCCA 476  
 NtAIR6 GTGATAAAAACCGAATAAATATCTCCGATCTGGTTAACTTTGGTAGCCA 461

NtAIR1 - - TTCAGAAACCGGAGAAATAACGATGTTTTAACAGAAAGGATCAGTGGATC 418  
 NtAIR3 - - TTCAGAAATCGGAGAAATAACGATGTTTTAGCCGTAGGATCAGTGGATC 415  
 NtAIR2 - - - - - TGAAGGTGGCTATG - - - - - 415  
 NtAIR7 TTTTCATGAATAATGATAATAATGGTATATCCGCCCTTCAGTTCAACGGATC 435  
 NtAIR4 - - TTGATAAATCTGAGAATACTCGATATTTTATCAATCGGTGCACCGAATC 427  
 NtAIR8 - - TTGATAAATCTGAGAACCAACGATATTTTATCAGTCCGTGCACCGAATC 427  
 NtAIR5 AGGGAATAATAATAATGATAATAGTCTGTTTGCAGGGTTACGGAGGGGTTG 526  
 NtAIR6 AGGGAATAGTAAT - - - GATAATAGTCTCAGTTGCAGGGTTACGGAGGGGTTG 508

NtAIR1 GGATAGATCGGACGGTGGAGATA - - - - - CAGAAAGAAAGGGTTATAGAG 462  
 NtAIR3 AGATAGATCGGACGGTGGAGATG - - - - - CAGAAAGAAAGGGTTATAGAG 455  
 NtAIR2 - - - - - TGAAGGTGGCTATG - - - - - GAGACACCAAAATGGTAGAA 450  
 NtAIR7 GGTTAGATCTGAAGGTGACACCG - - - - - CAGACACCAAGAAATGGTAGAG 483  
 NtAIR4 TGTTAGATCGGACGGCGGAGATG - - - - - CGATCTGCCAAGGTAGTGGAG 471  
 NtAIR8 TGTTAGATCAGACGGTGGAGATG - - - - - CGATCTGCCAAGGTAGTGGAG 471  
 NtAIR5 GTATGGATCGTTTCAGTAGTGTGTTGCCTCAGCCAGTAAGGGTAGTGGGG 576  
 NtAIR6 GTATGGATCGTTTCAGTACTTATGTTGCCTCAGCCAGTAAGGGTAGTGGGG 558

NtAIR1 TCATGGGTGATGGTGGATAAAATGACAAACACGTTGGTAGATGGAGAAGC 512  
 NtAIR3 TCATGGGTGATGGTGGATAAAATGTCAAACACGTTGGTAGATGGAGAAGC 505  
 NtAIR2 TCTTGGGTGATGGTGGAAAGCTATGACAAAATGTTTGTAGATCGAGAAGC 506  
 NtAIR7 TCTTGGGTGATGGTGGATAGAAATAACAAACAATTTGTGGATAGTGAAGC 533  
 NtAIR4 TCATGGGTGATGGTTGATGGTATAACAAACACTTTGGTAGATTTATCAGC 521  
 NtAIR8 TCATGGGTGATGGTTGATGGTATAACAAATACITTTGGTAAGTTTATCAGC 521  
 NtAIR5 TCATGGGTAAAGGTGGAAAGCGTGACTGACGCGTGGCGGAAGGGTATGG 626  
 NtAIR6 TCATGGGTAAAGGTGGAAAGCGTGACTGACGCGTGGGTAGAAGGGTATGG 608

NtAIR1 GTTAGGGAGTACGGACATGGATTAAGATGAAGAATCTGGAAGCTGACACGT 562  
 NtAIR3 GCTAGGGAGTACGGACATGGAGAAGATGAAGAATTGGGAAGCTGACACGT 555  
 NtAIR2 TTTAGGAAGTACAGATACAGAGAAGATGAAGAATCTAGACAAAGACACCT 550  
 NtAIR7 CTTAGGAAGTACGGACATGGAGAAATGAAGAATCTGGAGACGGACACGT 583  
 NtAIR4 CTTAGGAAGTACGGATACGGAGAAGATGAAGAATCTGGAAGCTGACACGT 571  
 NtAIR8 CTTAGGAAATACGGATACGGAGAAGATGAAGAATCTGGAAGCTGACACGT 571  
 NtAIR5 GCTAGGACGTACGGATGAGGACAAACCTGGTGAATCTAGAGCGGACAGCT 676  
 NtAIR6 GCTAGGACGTACAGATGAGGAGAAACCTGGTAAATCTAGAGCTGGACAGCT 658

|         |                                                       |     |
|---------|-------------------------------------------------------|-----|
| NtAitr1 | GTCCAGGGCTCATATCGGACGGCTTAGATAGGGTTCAGTGGGTGAATCTG    | 612 |
| NtAitr3 | GTCCAGGGCTCATATCAGACGGCTTAGATAGGGTCCGGTGGGTGAATCTG    | 609 |
| NtAitr2 | GTCCAGGGTTGATATCTGATGCCCTAAATAGGGTTCAGTGGGTGAATCCG    | 600 |
| NtAitr7 | ATCCAGGGCTCGTGTCCGATAGCTCAGATAGGGTCCGGTGGGTGAATCCG    | 633 |
| NtAitr4 | GTCCAGGTATGATATCGGACGGCTTAGATAGGGTACAGTGGGTGAATCTA    | 621 |
| NtAitr8 | GTCCAGGAATCATATCGGACGGCTTAGATAGGGTACAGTGGGTGAATCTA    | 621 |
| NtAitr5 | GTCCAGGGTTTGTATCAGACGGTTTAAACAGAGTTAGGTGGGCCAATAGG    | 726 |
| NtAitr6 | GTCCAGGGTTTGTATCAGACGGTTTAAATAGAGTTAGGTGGGCCAATAGG    | 708 |
|         |                                                       |     |
| NtAitr1 | ACGTATAGGAGATTGGTTGATCCTCTAGAAGGGTCTTGGAAACGCCGCCGGA  | 662 |
| NtAitr3 | GCGTATAGGAGATTGGTTGGATCCTCTAGAAGGGTCTTGGAAACACCGCCGGA | 659 |
| NtAitr2 | GCAATACCGGAGAATGGTGAATCCTCTAGAAGGCCGGAAGGAGCACCGCCGGA | 650 |
| NtAitr7 | GCGTACCGGAGAATGGTGAATCCTCTAGAAGACCGAAGGAGTGAACCGCGGA  | 683 |
| NtAitr4 | GCGTATCGGAGAATGATAGATCCGTTAGAAGACCGAAGGAGCGCCCGCGGA   | 671 |
| NtAitr8 | GCGTATCGGAGAATGATAGATCCGTTAGAAGACCGCGGAGAGCCACCGGA    | 671 |
| NtAitr5 | GCGTACAAGGAGATGGTAAAGT-----GAGGGAGGCGTAGCAGAGGGGGA    | 770 |
| NtAitr6 | GCGTACAAGGAGATGGTGAAGC-----GAGGGTGGCGTAGCAGAAAGGAGA   | 752 |
|         |                                                       |     |
| NtAitr1 | GCTGGTGACGTGGCTGGTATGTAAGGAGAAA--ATAAATTGTGCTTCTTTC   | 710 |
| NtAitr3 | GCTGGTGACGTGGCTGGTTGTGAAGGAGAAA--ATAAATTGTGCTTCTTTC   | 707 |
| NtAitr2 | GATGGTGGTGAGGTGGTTGTGAGGAAGGAG--GAAAAAGTGAAGAGTT      | 698 |
| NtAitr7 | GATGGTGGTGAAAGATGGTTGTGAAGGAGAAA--ATAAGAGAGGAAGAATT   | 731 |
| NtAitr4 | GATGGTGGTGAGGTTAGTTTGTGAAGGAGAAA--AAAAGTGTACGATTAT-   | 718 |
| NtAitr8 | GATGGTGGTGCGGTTAGTTTGTGAAGGAGAAA--AAAAGTGTACCATTTAT   | 719 |
| NtAitr5 | AGTTGTTTGGCTGGTGAATGAAGAAGAGTCTACGGCTGCCGGAAGCA       | 820 |
| NtAitr6 | AGTTGTTTGGCTGGTGAATGAAGAAGAGTCTACGGCTGCCGGAAGCA       | 802 |
|         |                                                       |     |
| NtAitr1 | TTTTC-----CAGCTTTTGCATGCACTGTAAAGGATACTGTATAT-----    | 749 |
| NtAitr3 | GCC-----AGCTTTTGCATGCACTGTAAAGGATACTGTATAT-----       | 743 |
| NtAitr2 | GCC-----AAATTTTGCATGCACTGTGAGGGTAGTGTATACATTGAAG      | 741 |
| NtAitr7 | ACCTG-----CAGCTTTTGCATGCAATGTGAGGTTAGTGTATACATGGAAG   | 777 |
| NtAitr4 | -----CAGCTTTTGCATGCACTGTGAGAGTTGTTTATACAAATGAAT       | 759 |
| NtAitr8 | ATTATT-ACCAGCTTTTGCATGCACTGTGAGAGTTGTGTATACAAATGAAT   | 768 |
| NtAitr5 | AAAACACGGCGGGCTTACAGTGC CGGGTTAGGGTTATCAAAAGCGGGAAG   | 870 |
| NtAitr6 | AAAACACGGCTGGCTTACAGTGC CAGGTTAGGGTTGATTAGAAGTGGAAG   | 852 |
|         |                                                       |     |
| NtAitr1 | -----GAAGCACTCACAGACAATGCCGTGTGATGTGTGGAAGATGGATTT    | 794 |
| NtAitr3 | -----GAAGCACTCACCGACAATGCCGTGTGATGTGTGGAAGATGGATTT    | 788 |
| NtAitr2 | AATAAGAA--CTCACAAACAATAACCTGTGTGATGTGTGGAAGATGGAGTT   | 788 |
| NtAitr7 | AATAAGAAAAACTCACGAACAATGCCITGTGATGTGTGGAAGATGGAGTT    | 827 |
| NtAitr4 | AAGGTGAAACAGACAAGGACAATGCCITGTGACGTGTGGAAGATGGATTT    | 809 |
| NtAitr8 | AATGTGAAGCAGACAAGGACAATGCCITGTGACGTGTGGAAGATGGATTT    | 818 |
| NtAitr5 | GA--GAAAACCTCACTGATTCTGCCGTGTGATGTGTGGAAGATGGACGG     | 917 |
| NtAitr6 | GA--GAAAACCTCGCTGATTCTGCCGTGTGATGTGTGGAAGATGGACGG     | 899 |
|         |                                                       |     |
| NtAitr1 | TGGAGGATTATTTGCATGGAGATTTGATGCTAAAAGCTGCACTTAGTTTGG   | 844 |
| NtAitr3 | TGGAGGATTATTTGCATGGAGATTTGATGCTAAAAGCTGCACTTAGTTTGG   | 838 |
| NtAitr2 | TGGAGGATT--TGCATGGAGGCTTGTATCTAAGACTGTACTTAGATTGG     | 835 |
| NtAitr7 | TGGAGGCTT--TGCATGGAGGTTTGTATCTAAATGCTGCACTTAGCTTGG    | 874 |
| NtAitr4 | TGGAGGATT--TGCATGGAGATTTGATGCTAAGGCTGCACTTAGCTTGG     | 856 |
| NtAitr8 | TGGAGGATT--TGCATGGAGATTTGATGCTAAAAGCTGCACTTAGTTTGG    | 865 |
| NtAitr5 | CGGAGGATA--TGCATGGAGGTTTGATACAAAGGCAGCTCTCTCTTTTGG    | 964 |
| NtAitr6 | TGGCGGATA--TGCATGGAGGTTTGATACAAAGGCAGCTCTCTCTTTTGG    | 946 |
|         |                                                       |     |
| NtAitr1 | GTCTGTTGA                                             | 852 |
| NtAitr3 | GTCTGTTGA                                             | 846 |
| NtAitr2 | GTCTGTTAA                                             | 843 |
| NtAitr7 | GTCTGTTAA                                             | 882 |
| NtAitr4 | GGATTTTGA                                             | 864 |
| NtAitr8 | GGATTTTGA                                             | 873 |
| NtAitr5 | GCCGGTAG                                              | 972 |
| NtAitr6 | GCCGGTAG                                              | 954 |

**Figure S3.** CDS sequences alignment of *NtAitr*s.

Sequence alignment was performed using BioEdit. Identical nucleotides were shaded in black.



**Table S1.** Primers used in this study

| Primer                         | Sequence 5'-3'                                                               |
|--------------------------------|------------------------------------------------------------------------------|
| NtAITR1/3-Nde1F                | CAACATATGGACGGTGGAAATGGTTG                                                   |
| NtAITR1/3-Sac1R                | CAAGAGCTCAACGACCCAACTAAGTGC                                                  |
| NtAITR5/6-Nde1F                | CAACATATGGATGGTAGAGGAGGGTG                                                   |
| NtAITR5/6-Sac1R                | CAAGAGCTCCTACCGGCCCAAAGAGAGAG                                                |
| NtAITR2-Nde1F                  | CAACATATGGATGTTGGGGATGGTGG                                                   |
| NtAITR2-Sac1R                  | CAAGAGCTCTTAACAACCCAATCTAAGTACAG                                             |
| NtAITR4-Nde1F                  | CAACATATGGACATCGAAAACAATTGG                                                  |
| NtAITR4-Sac1R                  | CAAGAGCTCAAATCCCCCAAAGTAAGTGC                                                |
| NtAITR7-Nde1F                  | CAACATATGGATGTTGAGAATAGTGG                                                   |
| NtAITR7-Sac1R                  | CAAGAGCTCTTAACGACCCAAGCTAAGTGCAG                                             |
| NtAITR8-Nde1F                  | CAACATATGGACGTCGGAAACAATTGG                                                  |
| NtAITR8-Sac1R                  | CAAGAGCTCAAATCCCCCAACTAAGTGC                                                 |
| NtAITR1-F                      | GTTTTAACAGAAGGATC                                                            |
| NtAITR2-F                      | TGAAGAAGTTTAATGATAATGGAAG                                                    |
| NtAITR3-F                      | CGATGTTTTAGCCGTAG                                                            |
| NtAITR5-R                      | TTATCATTATTATTATCCCTTG                                                       |
| NtAITR6-R                      | CAACTGACTATTATCATTACTA                                                       |
| NtPYL7-F                       | ATGCTTCCCAATAGTCAGA                                                          |
| NtPYL7-R                       | CGGACTTCACGGAGAGTA                                                           |
| PP2CA-F                        | GCTGGTGATAATAATCTGTC                                                         |
| PP2CA-R                        | AGACGATAATCTTCTCGGA                                                          |
| NtGAPHD-F                      | TGGGTGTCAACGAGAAGGAA                                                         |
| NtGAPHD-R                      | TCTGGGTGGCAGTAAGGGA                                                          |
| Pps-GGL                        | TTCAGAggtctcTctcgACTAGTATGGAATCGGCAGCAAAGG                                   |
| AtU6-1-sgRNA1-<br>gRT-sgRNA1+  | CCGGCGACCGGTTTAGGTGCaatcactacttctgt<br>CACCTAAACCGGTCGCCGGgttttagagctagaaat  |
| Pgs-GG2                        | AGCGTGggtctcGtcaggTCCATCCACTCCAAGCTC                                         |
| Pps-GG2                        | TTCAGAggtctcTctgacacTGGAATCGGCAGCAAAGG                                       |
| AtU6-26-sgRNA2-<br>gRT-sgRNA2+ | TCTTCCACACATCACACGGCaatcactacttegactc<br>CCGTGTGATGTGTGGAAGAgtttagagctagaaat |
| Pgs-GG3                        | AGCGTGggtctcGtcttcacTCCATCCACTCCAAGCTC                                       |
| Pps-GG3                        | TTCAGAggtctcTaagacttTGGAATCGGCAGCAAAGG                                       |
| AtU6-29-sgRNA3-<br>gRT-sgRNA3+ | CCAGCGGCTGTTTTAGGAGCaatctcttagtcgact<br>CTCCTAAACAGCCGCTGGgttttagagctagaaat  |
| Pgs-GG4                        | AGCGTGggtctcGagtcttTCCATCCACTCCAAGCTC                                        |
| Pps-GG4                        | TTCAGAggtctcTgactacaTGGAATCGGCAGCAAAGG                                       |
| AtU6-1-sgRNA4-<br>gRT-sgRNA4+  | TTCTCCACACATCACACGGCaatcactacttctgt<br>CCGTGTGATGTGTGGAGAAgttttagagctagaaat  |
| Pgs-GGR                        | AGCGTGggtctcGaccgACGCGTATCCATCCACTCCAAGCTC                                   |
